# Supplementary material for: SHAPE-guided RNA structure homology search and motif discovery
Source: PubMed Central journal article supplement (PMC8971488; doi:10.1038/s41467-022-29398-y), 2022-03-31
Supplement: 41467_2022_29398_MOESM3_ESM.pdf [file 41467_2022_29398_MOESM3_ESM.pdf]

## Reporting Summary

Nature Portfolio wishes to improve the reproducibility of the work that we publish. This form provides structure for consistency and transparency in reporting. For further information on Nature Portfolio policies, see our [Editorial Policies](#) and the [Editorial Policy Checklist](#).

### Statistics

For all statistical analyses, confirm that the following items are present in the figure legend, table legend, main text, or Methods section.

n/a Confirmed

- The exact sample size ( $n$ ) for each experimental group/condition, given as a discrete number and unit of measurement
- A statement on whether measurements were taken from distinct samples or whether the same sample was measured repeatedly
- The statistical test(s) used AND whether they are one- or two-sided  
*Only common tests should be described solely by name; describe more complex techniques in the Methods section.*
- A description of all covariates tested
- A description of any assumptions or corrections, such as tests of normality and adjustment for multiple comparisons
- A full description of the statistical parameters including central tendency (e.g. means) or other basic estimates (e.g. regression coefficient) AND variation (e.g. standard deviation) or associated estimates of uncertainty (e.g. confidence intervals)
- For null hypothesis testing, the test statistic (e.g.  $F$ ,  $t$ ,  $r$ ) with confidence intervals, effect sizes, degrees of freedom and  $P$  value noted  
*Give  $P$  values as exact values whenever suitable.*
- For Bayesian analysis, information on the choice of priors and Markov chain Monte Carlo settings
- For hierarchical and complex designs, identification of the appropriate level for tests and full reporting of outcomes
- Estimates of effect sizes (e.g. Cohen's  $d$ , Pearson's  $r$ ), indicating how they were calculated

*Our web collection on [statistics for biologists](#) contains articles on many of the points above.*

### Software and code

Policy information about [availability of computer code](#)

Data collection

Data analysis

For manuscripts utilizing custom algorithms or software that are central to the research but not yet described in published literature, software must be made available to editors and reviewers. We strongly encourage code deposition in a community repository (e.g. GitHub). See the Nature Portfolio [guidelines for submitting code & software](#) for further information.

## Data

Policy information about [availability of data](#)

All manuscripts must include a [data availability statement](#). This statement should provide the following information, where applicable:

- Accession codes, unique identifiers, or web links for publicly available datasets
- A description of any restrictions on data availability
- For clinical datasets or third party data, please ensure that the statement adheres to our [policy](#)

Sequencing data has been deposited to the Gene Expression Omnibus (GEO) database, under the accession GSE189259 (<https://www.ncbi.nlm.nih.gov/geo/query/acc.cgi?acc=GSE189259>). Additional processed files (normalized SHAPE reactivity profiles, SHAPEwarp databases and queries needed to reproduce the analyses detailed in the manuscript, Stockholm alignments and covariance models for the structure elements identified in this work) are available at [http://www.incarnatolab.com/datasets/SHAPEwarp\\_Morandi\\_2022.php](http://www.incarnatolab.com/datasets/SHAPEwarp_Morandi_2022.php).

## Field-specific reporting

Please select the one below that is the best fit for your research. If you are not sure, read the appropriate sections before making your selection.

- Life sciences       Behavioural & social sciences       Ecological, evolutionary & environmental sciences

For a reference copy of the document with all sections, see [nature.com/documents/nr-reporting-summary-flat.pdf](https://nature.com/documents/nr-reporting-summary-flat.pdf)

## Life sciences study design

All studies must disclose on these points even when the disclosure is negative.

|                 |                                                                                                                                                                                                                                                                                                                                                                                                                                                                              |
|-----------------|------------------------------------------------------------------------------------------------------------------------------------------------------------------------------------------------------------------------------------------------------------------------------------------------------------------------------------------------------------------------------------------------------------------------------------------------------------------------------|
| Sample size     | We generated n=1 replicates of SARS-CoV-2 and SARS-CoV in vitro refolded RNA, probed with SHAPE. n=1 replicates of E. coli and B. subtilis rRNAs, DENV-1/4 serotype genomes, and ZIKV Africa/Asia lineage genomes probed with SHAPE were obtained from literature. Since we are not performing any statistical comparison, nor drawing any biological conclusions, but just evaluating the performances of a computational method, there is no need for multiple replicates. |
| Data exclusions | No data was excluded.                                                                                                                                                                                                                                                                                                                                                                                                                                                        |
| Replication     | Since we are not performing any statistical comparison, nor drawing any biological conclusions, but just evaluating the performances of a computational method, there is no need for multiple replicates.                                                                                                                                                                                                                                                                    |
| Randomization   | Sample randomization was not necessary for this study because all samples came from a single source. For E-value estimation, databases built using SHAPE reactivity profiles were randomly shuffled in 10 nt blocks. 100 shuffles were performed for each database entry and a chunk of a maximum size of 1,000 nt was randomly extracted from each shuffled entry and used to build the shuffled database.                                                                  |
| Blinding        | Blinding was irrelevant to this study as all data were analyzed objectively using the same computational pipeline.                                                                                                                                                                                                                                                                                                                                                           |

## Reporting for specific materials, systems and methods

We require information from authors about some types of materials, experimental systems and methods used in many studies. Here, indicate whether each material, system or method listed is relevant to your study. If you are not sure if a list item applies to your research, read the appropriate section before selecting a response.

### Materials & experimental systems

|                                     |                                                           |
|-------------------------------------|-----------------------------------------------------------|
| n/a                                 | Involved in the study                                     |
| <input checked="" type="checkbox"/> | <input type="checkbox"/> Antibodies                       |
| <input type="checkbox"/>            | <input checked="" type="checkbox"/> Eukaryotic cell lines |
| <input checked="" type="checkbox"/> | <input type="checkbox"/> Palaeontology and archaeology    |
| <input checked="" type="checkbox"/> | <input type="checkbox"/> Animals and other organisms      |
| <input checked="" type="checkbox"/> | <input type="checkbox"/> Human research participants      |
| <input checked="" type="checkbox"/> | <input type="checkbox"/> Clinical data                    |
| <input checked="" type="checkbox"/> | <input type="checkbox"/> Dual use research of concern     |

### Methods

|                                     |                                                 |
|-------------------------------------|-------------------------------------------------|
| n/a                                 | Involved in the study                           |
| <input checked="" type="checkbox"/> | <input type="checkbox"/> ChIP-seq               |
| <input checked="" type="checkbox"/> | <input type="checkbox"/> Flow cytometry         |
| <input checked="" type="checkbox"/> | <input type="checkbox"/> MRI-based neuroimaging |

## Eukaryotic cell lines

Policy information about [cell lines](#)

Cell line source(s)

Authentication

Cell line was not authenticated.

Mycoplasma contamination

Cells were tested negative for Mycoplasma using the MycoAlert™ Mycoplasma Detection Kit (Lonza, cat. LT07-318).

Commonly misidentified lines  
(See [ICLAC](#) register)

Not among commonly misidentified lines in ICLAC register.
